# Supplementary material
Source: PubMed Central journal article supplement (PMC212779)
Supplement: jamia_M1281_1.pdf [file jamia_M1281_1.pdf]

**Table 2. Sample Arden Syntax Logic Slot portion from Age and Gender**

```
logic:

    /* BEGIN LOGIC SLOT */
    Type_of_Risk := I ; /* Intrinsic/Extrinsic Risk Factor */
    Risk_factor_weight = 1 ;
    min_age := 65;

    /* Note that pat_age is a number between 0 to 150*/
    /* Valid input to sex = M or F */
    /* Calculate current age */

    if pat_age is not number then
        conclude false;
    endif;
    /* negative age or older than 150 is not valid */
    if (pat_age < 0) or (pat_age > 150) then
        conclude false;
    endif;
    /* Check to make sure sex is "M or F" */
    if (pat_sex is not equal "M") or
        (pat_sex is not equal "F") then
        conclude false;
    endif;
    /* Return those with low risk based on age */
    /* For those with higher risk based on age, check the
corresponding gender as well */
    if (pat_age < min_age) then
        Risk_level := 0;
        RT_msg = Msg0;
    elseif ((pat_age <74) and (pat_sex = "M")) or ((pat_age <80)
and (pat_sex = "F")) then
        Risk_level := 1;
        RT_msg := Msg1;
    elseif ((pat_age >74) and (pat_sex = "M")) or ((pat_age >80)
and (pat_age < 89) and (pat_sex = "F")) then
        Risk_level := 2;
        RT_msg := Msg1 || Msg2;
    elseif (pat_age >= 89) and (pat_sex = "F") then
        Risk_level := 3;
        RT_msg := Msg1 || Msg 2;
    endif;
    conclude true;

    /* END LOGIC SLOT */
```
